# Supplementary material
Source: PubMed Central journal article supplement (PMC3143828)
Supplement: supp_ssr003_00006544-file001.pdf [file supp_ssr003_00006544-file001.pdf]

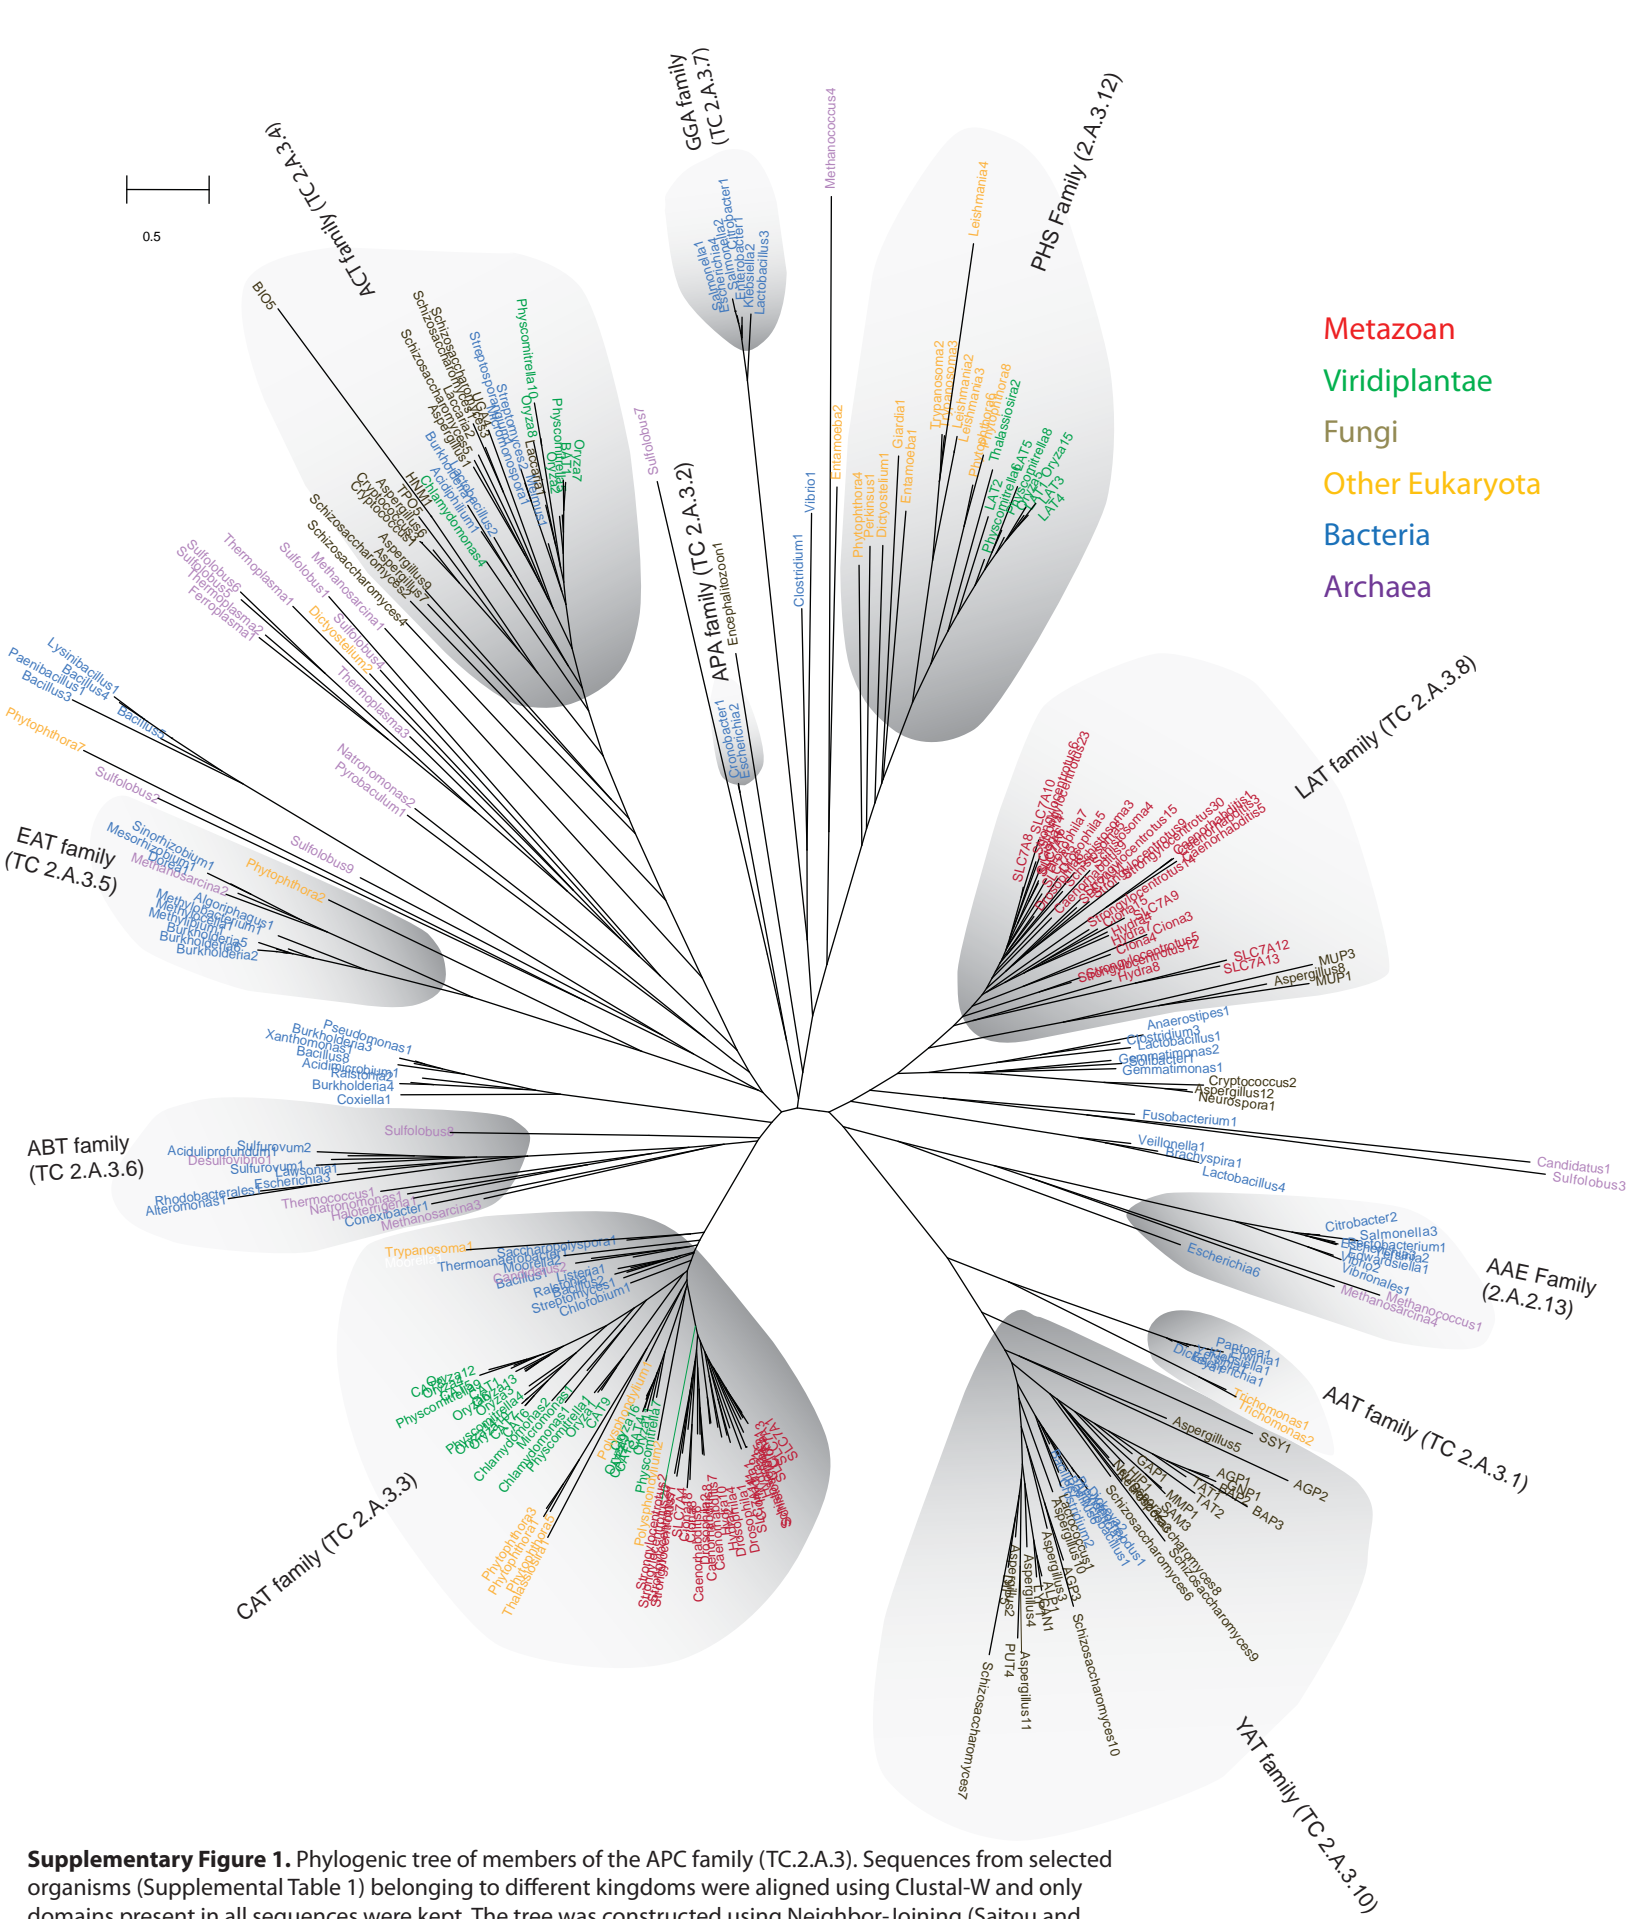

**Supplementary Figure 1.** Phylogenetic tree of members of the APC family (TC.2.A.3). Sequences from selected organisms (Supplemental Table 1) belonging to different kingdoms were aligned using Clustal-W and only domains present in all sequences were kept. The tree was constructed using Neighbor-Joining (Saitou and Nei, 1987), from the MEGA4 package (Kumar et al, 2008). The evolutionary distances were computed using the Poisson correction method (Zuckerandl and Pauling, 19665) and are in the units of the number of amino acid substitutions per site. The rate variation among sites was modeled with a gamma distribution (shape parameter = 1). All ambiguous positions were removed for each sequence pair. The grouping was confirmed by Bayesian Inference using a subset of the sequences, representative of each of the clades (Supplementary Figure 3).

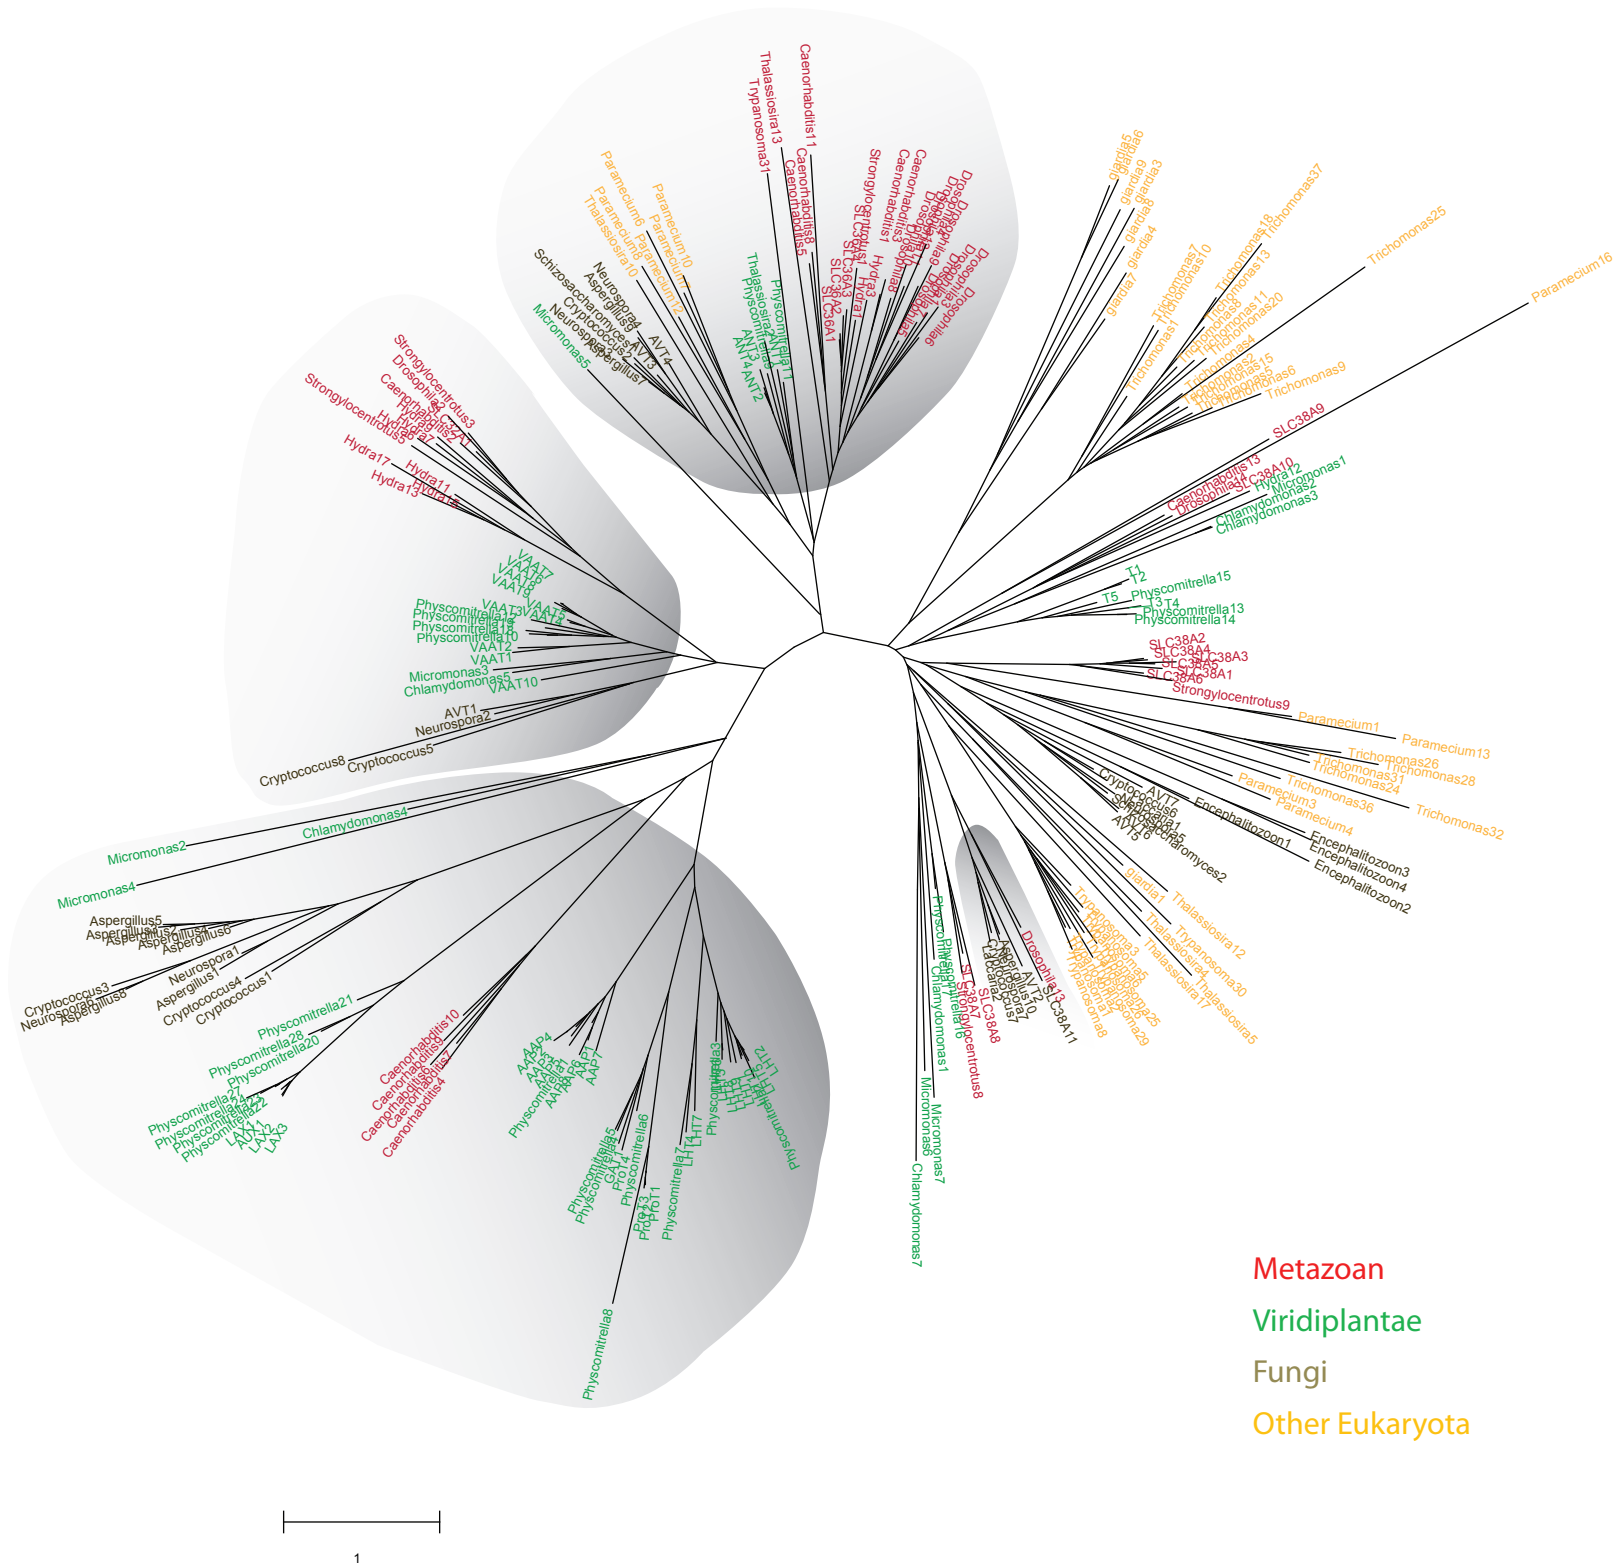

**Supplementary Figure 2.** Phylogenetic tree of members of the AAP family (TC.2.A.18). The phylogenetic tree from sequences selected from organisms (Supplemental Table 2) belonging to different kingdoms was performed as described in Supplementary Figure 1.

**A**

Metazoan  
 Viridiplantae  
 Fungi  
 Other Eukaryota  
 Bacteria  
 Archaea

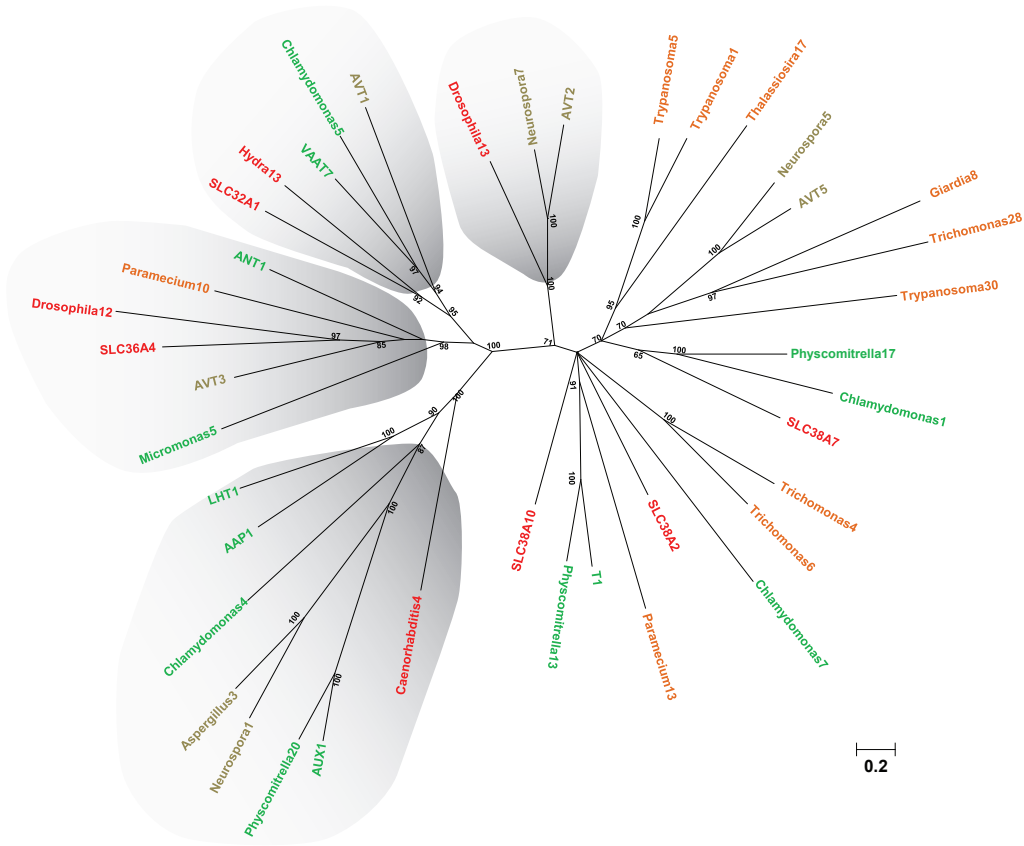

**B**

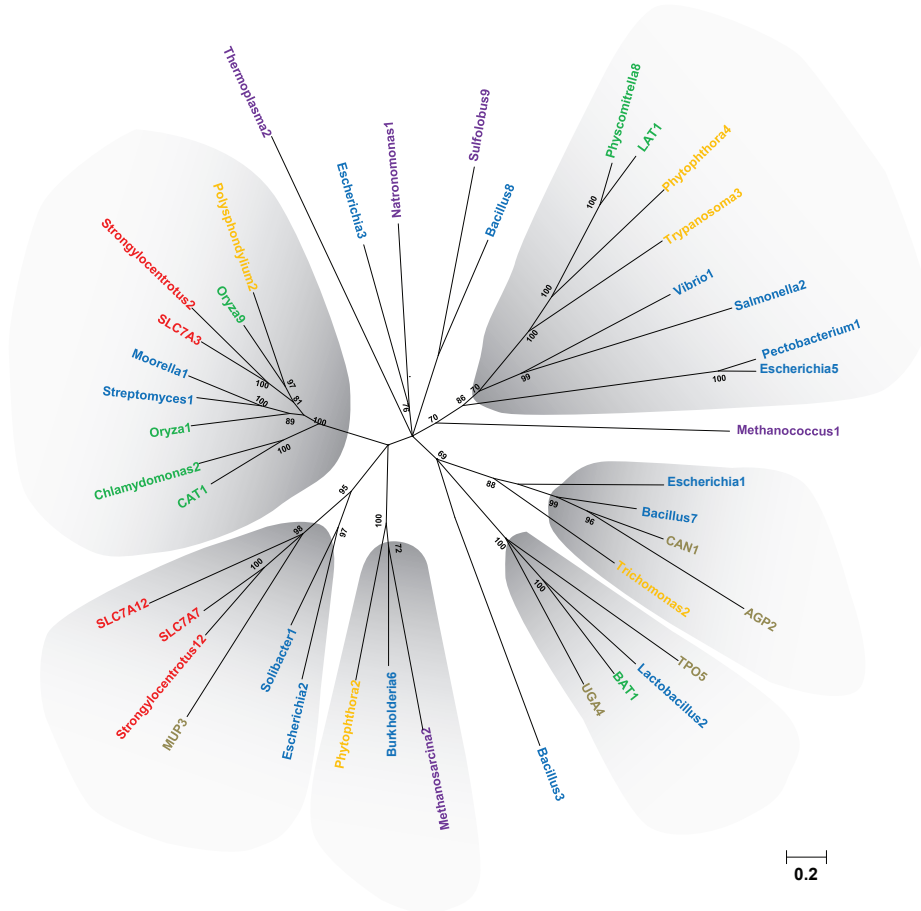

**Supplementary Figure 3.** Bayesian inference tree from APC and AAAP families. Sequence from each of the clades identified with the Neighbor Joining phylogeny of the AAAP (A) and APC (B) families (see Supplemental Figures S1 and S2) were aligned by Clustal-W, retaining the domains present in all proteins. The phylogenies were constructed with MrBayes (Huelsenbeck et al, 2001; Ronquist and Huelsenbeck, 2003), using mixed protein models, and 1,000,000 and 500,000 generations respectively.

**Supplementary Table 1.** Sequences from the APC family used for phylogeny construction. Sequences from Genbank (<http://www.ncbi.nlm.nih.gov/genbank/>) were retrieved by psi-BLASTp (Altschul et al, 1997) searches using known members of the family as query.

| <b>GI / Identifier</b> | <b>Species</b>                                                              | <b>Name on tree</b> |
|------------------------|-----------------------------------------------------------------------------|---------------------|
| 254168086              | <i>Aciduliprofundum boonei</i> T469                                         | Aciduliprofundum1   |
| 170289950              | <i>Candidatus Korarchaeum cryptofilum</i> OPF8                              | Candidatus1         |
| 154150194              | <i>Candidatus Methanoregula boonei</i> 6A8                                  | Candidatus2         |
| 257077094              | <i>Ferroplasma acidarmanus</i> fer1                                         | Ferroplasma1        |
| 284165361              | <i>Haloterrigena turkmenica</i> DSM 5511                                    | Haloterrigena1      |
| 163799556              | <i>Methanococcus voltae</i> A3                                              | Methanococcus1      |
| 163799145              | <i>Methanococcus voltae</i> A3                                              | Methanococcus2      |
| 20091257               | <i>Methanosarcina acetivorans</i> C2A                                       | Methanosarcina1     |
| 2746072                | <i>Methanosarcina barkeri</i>                                               | Methanosarcina2     |
| 21229288               | <i>Methanosarcina mazei</i> Go1                                             | Methanosarcina3     |
| 21228948               | <i>Methanosarcina mazei</i> Go1                                             | Methanosarcina4     |
| 76800975               | <i>Natronomonas pharaonis</i> DSM 2160                                      | Natronomonas1       |
| 76800675               | <i>Natronomonas pharaonis</i> DSM 2160                                      | Natronomonas2       |
| 126459945              | <i>Pyrobaculum calidifontis</i> JCM 11548                                   | Pyrobaculum1        |
| 14591242               | <i>Pyrococcus horikoshii</i> OT3                                            | Pyrococcus1         |
| 284998687              | <i>Sulfolobus islandicus</i> L.D.8.5                                        | Sulfolobus1         |
| 227828979              | <i>Sulfolobus islandicus</i> M.14.25                                        | Sulfolobus2         |
| 227828821              | <i>Sulfolobus islandicus</i> M.14.25                                        | Sulfolobus3         |
| 229584701              | <i>Sulfolobus islandicus</i> M.16.27                                        | Sulfolobus4         |
| 238619498              | <i>Sulfolobus islandicus</i> M.16.4                                         | Sulfolobus5         |
| 229582548              | <i>Sulfolobus islandicus</i> Y.N.15.51                                      | Sulfolobus6         |
| 284175213              | <i>Sulfolobus solfataricus</i> 98/2                                         | Sulfolobus7         |
| 15921087               | <i>Sulfolobus tokodaii</i> str. 7                                           | Sulfolobus8         |
| 15922067               | <i>Sulfolobus tokodaii</i> str. 7                                           | Sulfolobus9         |
| 240103912              | <i>Thermococcus gammatolerans</i> EJ3                                       | Thermococcus1       |
| 10640472               | <i>Thermoplasma acidophilum</i>                                             | Thermoplasma1       |
| 16081747               | <i>Thermoplasma acidophilum</i> DSM 1728                                    | Thermoplasma2       |
| 13541742               | <i>Thermoplasma volcanium</i> GSS1                                          | Thermoplasma3       |
| 256371736              | <i>Acidimicrobium ferrooxidans</i> DSM 10331                                | Acidimicrobium1     |
| 148261377              | <i>Acidiphilium cryptum</i> JF-5                                            | Acidiphilium1       |
| 126645790              | <i>Algoriphagus</i> sp. PR1                                                 | Algoriphagus1       |
| 258512211              | <i>Alicyclobacillus acidocaldarius</i> subsp. <i>acidocaldarius</i> DSM 446 | Alicyclobacillus1   |
| 196155226              | <i>Alteromonas macleodii</i> 'Deep ecotype'                                 | Alteromonas1        |
| 167747463              | <i>Anaerostipes caccae</i> DSM 14662                                        | Anaerostipes1       |
| 228999912              | <i>Bacillus mycoides</i> Rock3-17                                           | Bacillus1           |
| 228913507              | <i>Bacillus thuringiensis</i> serovar <i>pulsiensis</i> BGSC 4CC1           | Bacillus2           |
| 194015764              | <i>Bacillus pumilus</i> ATCC 7061                                           | Bacillus3           |

|           |                                                                 |                        |
|-----------|-----------------------------------------------------------------|------------------------|
| 229133246 | <i>Bacillus cereus</i> BDRD-ST196                               | <i>Bacillus</i> 4      |
| 229030801 | <i>Bacillus cereus</i> AH1271                                   | <i>Bacillus</i> 5      |
| 229542890 | <i>Bacillus coagulans</i> 36D1                                  | <i>Bacillus</i> 6      |
| 49479251  | <i>Bacillus thuringiensis</i> serovar konkukian str. 97-27      | <i>Bacillus</i> 7      |
| 16080500  | <i>Bacillus subtilis</i> subsp. <i>subtilis</i> str. 168        | <i>Bacillus</i> 8      |
| 227999742 | <i>Brachyspira murdochii</i> DSM 12563                          | <i>Brachyspira</i> 1   |
| 172062396 | <i>Burkholderia ambifaria</i> MC40-6                            | <i>Burkholderia</i> 1  |
| 126454164 | <i>Burkholderia pseudomallei</i> 1106a                          | <i>Burkholderia</i> 2  |
| 206563116 | <i>Burkholderia cenocepacia</i> J2315                           | <i>Burkholderia</i> 3  |
| 172059496 | <i>Burkholderia ambifaria</i> MC40-6                            | <i>Burkholderia</i> 4  |
| 91781402  | <i>Burkholderia xenovorans</i> LB400                            | <i>Burkholderia</i> 5  |
| 107024469 | <i>Burkholderia cenocepacia</i> AU 1054                         | <i>Burkholderia</i> 6  |
| 189347097 | <i>Chlorobium limicola</i> DSM 245                              | <i>Chlorobium</i> 1    |
| 283786839 | <i>Citrobacter rodentium</i> ICC168                             | <i>Citrobacter</i> 1   |
| 237729075 | <i>Citrobacter</i> sp. 30_2                                     | <i>Citrobacter</i> 2   |
| 226947574 | <i>Clostridium botulinum</i> A2 str. Kyoto                      | <i>Clostridium</i> 1   |
| 150015674 | <i>Clostridium beijerinckii</i> NCIMB 8052                      | <i>Clostridium</i> 2   |
| 164686601 | <i>Clostridium bartlettii</i> DSM 16795                         | <i>Clostridium</i> 3   |
| 284046370 | <i>Conexibacter woesei</i> DSM 14684                            | <i>Conexibacter</i> 1  |
| 212218186 | <i>Coxiella burnetii</i> CbuK_Q154                              | <i>Coxiella</i> 1      |
| 260599679 | <i>Cronobacter turicensis</i> z3032                             | <i>Cronobacter</i> 1   |
| 239906287 | <i>Desulfovibrio magneticus</i> RS-1                            | <i>Desulfovibrio</i> 1 |
| 242240447 | <i>Dickeya dadantii</i> Ech703                                  | <i>Dickeya</i> 1       |
| 271500890 | <i>Dickeya dadantii</i> Ech586                                  | <i>Dickeya</i> 2       |
| 166031092 | <i>Dorea formicigenerans</i> ATCC 27755                         | <i>Dorea</i> 1         |
| 269137828 | <i>Edwardsiella tarda</i> EIB202                                | <i>Edwardsiella</i> 1  |
| 288550498 | <i>Enterobacter cancerogenus</i> ATCC 35316                     | <i>Enterobacter</i> 1  |
| 188533227 | <i>Erwinia tasmaniensis</i> Et1/99                              | <i>Erwinia</i> 1       |
| 15801690  | <i>Escherichia coli</i> O157:H7 EDL933                          | <i>Escherichia</i> 1   |
| 188493591 | <i>Escherichia coli</i> 53638                                   | <i>Escherichia</i> 2   |
| 16128470  | <i>Escherichia coli</i> str. K-12 substr. MG1655                | <i>Escherichia</i> 3   |
| 89110879  | <i>Escherichia coli</i> str. K-12 substr. W3110                 | <i>Escherichia</i> 4   |
| 16131966  | <i>Escherichia coli</i> str. K-12 substr. MG1655                | <i>Escherichia</i> 5   |
| 242379642 | <i>Escherichia coli</i> 53638                                   | <i>Escherichia</i> 6   |
| 253582761 | <i>Fusobacterium varium</i> ATCC 27725                          | <i>Fusobacterium</i> 1 |
| 226227984 | <i>Gemmatimonas aurantiaca</i> T-27                             | <i>Gemmatimonas</i> 1  |
| 226227437 | <i>Gemmatimonas aurantiaca</i> T-27                             | <i>Gemmatimonas</i> 2  |
| 152970458 | <i>Klebsiella pneumoniae</i> subsp. <i>pneumoniae</i> MGH 78578 | <i>Klebsiella</i> 1    |
| 288937541 | <i>Klebsiella variicola</i> At-22                               | <i>Klebsiella</i> 2    |
| 227976187 | <i>Lactobacillus reuteri</i> SD2112                             | <i>Lactobacillus</i> 1 |
| 227523914 | <i>Lactobacillus hilgardii</i> ATCC 8290                        | <i>Lactobacillus</i> 2 |
| 116332788 | <i>Lactobacillus brevis</i> ATCC 367                            | <i>Lactobacillus</i> 3 |
| 199597506 | <i>Lactobacillus rhamnosus</i> HN001                            | <i>Lactobacillus</i> 4 |

|           |                                                                                 |                     |
|-----------|---------------------------------------------------------------------------------|---------------------|
| 15674175  | <i>Lactococcus lactis</i> subsp. <i>lactis</i> II1403                           | Lactococcus1        |
| 94986707  | <i>Lawsonia intracellularis</i> PHE/MN1-00                                      | Lawsonia1           |
| 224498726 | <i>Listeria monocytogenes</i> Finland 1988                                      | Listeria1           |
| 169829435 | <i>Lysinibacillus sphaericus</i> C3-41                                          | Lysinibacillus1     |
| 227990264 | <i>Meiothermus silvanus</i> DSM 9946                                            | Meiothermus1        |
| 260469724 | <i>Mesorhizobium opportunistum</i> WSM2075                                      | Mesorhizobium1      |
| 124267602 | <i>Methylibium petroleiphilum</i> PM1                                           | Methylibium1        |
| 218528764 | <i>Methylobacterium chloromethanicum</i> CM4                                    | Methylobacterium1   |
| 217978559 | <i>Methylocella silvestris</i> BL2                                              | Methylocella1       |
| 238063365 | <i>Micromonospora</i> sp. ATCC 39149                                            | Micromonospora1     |
| 83589589  | <i>Moorella thermoacetica</i> ATCC 39073                                        | Moorella1           |
| 83590754  | <i>Moorella thermoacetica</i> ATCC 39073                                        | Moorella2           |
| 251798187 | <i>Paenibacillus</i> sp. JDR-2                                                  | Paenibacillus1      |
| 258634929 | <i>Pantoea</i> sp. At-9b                                                        | Pantoea1            |
| 261820334 | <i>Pectobacterium wasabiae</i> WPP163                                           | Pectobacterium1     |
| 268589191 | <i>Providencia rettgeri</i> DSM 1131                                            | Providencia1        |
| 77458536  | <i>Pseudomonas fluorescens</i> Pf0-1                                            | Pseudomonas1        |
| 207742976 | <i>Ralstonia solanacearum</i> IPO1609                                           | Ralstonia1          |
| 187927016 | <i>Ralstonia pickettii</i> 12J                                                  | Ralstonia2          |
| 254463690 | Rhodobacterales bacterium Y4I                                                   | Rhodobacterales1    |
| 134101704 | <i>Saccharopolyspora erythraea</i> NRRL 2338                                    | Saccharopolyspora1  |
| 168244874 | <i>Salmonella enterica</i> subsp. <i>enterica</i> serovar Heidelberg str. SL486 | Salmonella1         |
| 213428685 | <i>Salmonella enterica</i> subsp. <i>enterica</i> serovar Typhi str. E02-1180   | Salmonella2         |
| 16767577  | <i>Salmonella typhimurium</i> LT2                                               | Salmonella3         |
| 15963846  | <i>Sinorhizobium meliloti</i> 1021                                              | Sinorhizobium1      |
| 116623871 | <i>Solibacter usitatus</i> Ellin6076                                            | Solibacter1         |
| 254402597 | <i>Streptomyces svuceus</i> ATCC 29083                                          | Streptomyces1       |
| 29830665  | <i>Streptomyces avermitilis</i> MA-4680                                         | Streptomyces2       |
| 271962357 | <i>Streptosporangium roseum</i> DSM 43021                                       | Streptosporangium1  |
| 152992623 | <i>Sulfurovum</i> sp. NBC37-1                                                   | Sulfurovum1         |
| 152992627 | <i>Sulfurovum</i> sp. NBC37-1                                                   | Sulfurovum2         |
| 20807215  | <i>Thermoanaerobacter tengcongensis</i> MB4                                     | Thermoanaerobacter1 |
| 282850442 | <i>Veillonella parvula</i> ATCC 17745                                           | Veillonella1        |
| 90577962  | <i>Vibrio angustum</i> S14                                                      | Vibrio1             |
| 254505716 | <i>Vibrio parahaemolyticus</i> 16                                               | Vibrio2             |
| 148975737 | Vibrionales bacterium SWAT-3                                                    | Vibrionales1        |
| 188577540 | <i>Xanthomonas oryzae</i> pv. <i>oryzae</i> PXO99A                              | Xanthomonas1        |
| 289175200 | <i>Xenorhabdus bovienii</i> SS-2004                                             | Xenorhabdus1        |
| 149366126 | <i>Yersinia pestis</i> CA88-4125                                                | Yersinia1           |
| 22127397  | <i>Yersinia pestis</i> KIM 10                                                   | Yersinia2           |
| 121705408 | <i>Aspergillus clavatus</i> NRRL 1                                              | Aspergillus1        |

|           |                                                               |                          |
|-----------|---------------------------------------------------------------|--------------------------|
| 121698393 | <i>Aspergillus clavatus</i> NRRL 1                            | <i>Aspergillus</i> 2     |
| 238492327 | <i>Aspergillus flavus</i> NRRL3357                            | <i>Aspergillus</i> 3     |
| 238503341 | <i>Aspergillus flavus</i> NRRL3357                            | <i>Aspergillus</i> 4     |
| 159125820 | <i>Aspergillus fumigatus</i> A1163                            | <i>Aspergillus</i> 5     |
| 70995688  | <i>Aspergillus fumigatus</i> Af293                            | <i>Aspergillus</i> 6     |
| 67903478  | <i>Aspergillus nidulans</i> FGSC A4                           | <i>Aspergillus</i> 7     |
| 145245147 | <i>Aspergillus niger</i>                                      | <i>Aspergillus</i> 8     |
| 145242012 | <i>Aspergillus niger</i>                                      | <i>Aspergillus</i> 9     |
| 169773161 | <i>Aspergillus oryzae</i> RIB40                               | <i>Aspergillus</i> 10    |
| 169785403 | <i>Aspergillus oryzae</i> RIB40                               | <i>Aspergillus</i> 11    |
| 115398536 | <i>Aspergillus terreus</i> NIH2624                            | <i>Aspergillus</i> 12    |
| 134115709 | <i>Cryptococcus neoformans</i> var. <i>neoformans</i> B-3501A | <i>Cryptococcus</i> 1    |
| 58263058  | <i>Cryptococcus neoformans</i> var. <i>neoformans</i> JEC21   | <i>Cryptococcus</i> 2    |
| 58261260  | <i>Cryptococcus neoformans</i> var. <i>neoformans</i> JEC21   | <i>Cryptococcus</i> 3    |
| 19074399  | <i>Encephalitozoon cuniculi</i> GB-M1                         | <i>Encephalitozoon</i> 1 |
| 170111226 | <i>Laccaria bicolor</i> S238N-H82                             | <i>Laccaria</i> 1        |
| 170086430 | <i>Laccaria bicolor</i> S238N-H82                             | <i>Laccaria</i> 2        |
| 11595634  | <i>Neurospora crassa</i>                                      | <i>Neurospora</i> 1      |
| 85095443  | <i>Neurospora crassa</i> OR74A                                | <i>Neurospora</i> 2      |
| 164427455 | <i>Neurospora crassa</i> OR74A                                | <i>Neurospora</i> 3      |
| YNR056C   | <i>Saccharomyces cerevisiae</i>                               | BIO5                     |
| YGL077C   | <i>Saccharomyces cerevisiae</i>                               | HNM1                     |
| YKL174C   | <i>Saccharomyces cerevisiae</i>                               | TPO5                     |
| YDL210W   | <i>Saccharomyces cerevisiae</i>                               | UGA4                     |
| YGR055W   | <i>Saccharomyces cerevisiae</i>                               | MUP1                     |
| YHL036W   | <i>Saccharomyces cerevisiae</i>                               | MUP3                     |
| YCL025C   | <i>Saccharomyces cerevisiae</i>                               | AGP1                     |
| YBR132C   | <i>Saccharomyces cerevisiae</i>                               | AGP2                     |
| YFL055W   | <i>Saccharomyces cerevisiae</i>                               | AGP3                     |
| YNL270C   | <i>Saccharomyces cerevisiae</i>                               | ALP1                     |
| YBR068C   | <i>Saccharomyces cerevisiae</i>                               | BAP2                     |
| YDR046C   | <i>Saccharomyces cerevisiae</i>                               | BAP3                     |
| YEL063C   | <i>Saccharomyces cerevisiae</i>                               | CAN1                     |
| YPL265W   | <i>Saccharomyces cerevisiae</i>                               | DIP5                     |
| YKR039W   | <i>Saccharomyces cerevisiae</i>                               | GAP1                     |
| YDR508C   | <i>Saccharomyces cerevisiae</i>                               | GNP1                     |
| YGR191W   | <i>Saccharomyces cerevisiae</i>                               | HIP1                     |
| YNL268W   | <i>Saccharomyces cerevisiae</i>                               | LYP1                     |
| YLL061W   | <i>Saccharomyces cerevisiae</i>                               | MMP1                     |
| YOR348C   | <i>Saccharomyces cerevisiae</i>                               | PUT4                     |
| YPL274W   | <i>Saccharomyces cerevisiae</i>                               | SAM3                     |
| YDR160W   | <i>Saccharomyces cerevisiae</i>                               | SSY1                     |
| YBR069C   | <i>Saccharomyces cerevisiae</i>                               | TAT1                     |

|           |                                  |                               |
|-----------|----------------------------------|-------------------------------|
| YOL020W   | <i>Saccharomyces cerevisiae</i>  | TAT2                          |
| 1351645   | <i>Schizosaccharomyces pombe</i> | <i>Schizosaccharomyces</i> 1  |
| 1351705   | <i>Schizosaccharomyces pombe</i> | <i>Schizosaccharomyces</i> 2  |
| 3581896   | <i>Schizosaccharomyces pombe</i> | <i>Schizosaccharomyces</i> 3  |
| 3150116   | <i>Schizosaccharomyces pombe</i> | <i>Schizosaccharomyces</i> 4  |
| 3116147   | <i>Schizosaccharomyces pombe</i> | <i>Schizosaccharomyces</i> 5  |
| 19859376  | <i>Schizosaccharomyces pombe</i> | <i>Schizosaccharomyces</i> 6  |
| 3560241   | <i>Schizosaccharomyces pombe</i> | <i>Schizosaccharomyces</i> 7  |
| 3150139   | <i>Schizosaccharomyces pombe</i> | <i>Schizosaccharomyces</i> 8  |
| 1620894   | <i>Schizosaccharomyces pombe</i> | <i>Schizosaccharomyces</i> 9  |
| 3136040   | <i>Schizosaccharomyces pombe</i> | <i>Schizosaccharomyces</i> 10 |
| 71995388  | <i>Caenorhabditis elegans</i>    | <i>Caenorhabditis</i> 1       |
| 71993915  | <i>Caenorhabditis elegans</i>    | <i>Caenorhabditis</i> 3       |
| 71982608  | <i>Caenorhabditis elegans</i>    | <i>Caenorhabditis</i> 5       |
| 17532491  | <i>Caenorhabditis elegans</i>    | <i>Caenorhabditis</i> 6       |
| 17533459  | <i>Caenorhabditis elegans</i>    | <i>Caenorhabditis</i> 7       |
| 17531343  | <i>Caenorhabditis elegans</i>    | <i>Caenorhabditis</i> 8       |
| 17540018  | <i>Caenorhabditis elegans</i>    | <i>Caenorhabditis</i> 9       |
| 198436956 | <i>Ciona intestinalis</i>        | <i>Ciona</i> 1                |
| 198425036 | <i>Ciona intestinalis</i>        | <i>Ciona</i> 3                |
| 198418289 | <i>Ciona intestinalis</i>        | <i>Ciona</i> 4                |
| 198437646 | <i>Ciona intestinalis</i>        | <i>Ciona</i> 5                |
| 198434395 | <i>Ciona intestinalis</i>        | <i>Ciona</i> 8                |
| 198417646 | <i>Ciona intestinalis</i>        | <i>Ciona</i> 11               |
| 198427264 | <i>Ciona intestinalis</i>        | <i>Ciona</i> 14               |
| 198416397 | <i>Ciona intestinalis</i>        | <i>Ciona</i> 15               |
| 198420267 | <i>Ciona intestinalis</i>        | <i>Ciona</i> 18               |
| 201065915 | <i>Drosophila melanogaster</i>   | <i>Drosophila</i> 1           |
| 24667468  | <i>Drosophila melanogaster</i>   | <i>Drosophila</i> 2           |
| 21356285  | <i>Drosophila melanogaster</i>   | <i>Drosophila</i> 4           |
| 21357367  | <i>Drosophila melanogaster</i>   | <i>Drosophila</i> 5           |
| 17647653  | <i>Drosophila melanogaster</i>   | <i>Drosophila</i> 6           |
| 19921172  | <i>Drosophila melanogaster</i>   | <i>Drosophila</i> 7           |
| NP_003036 | <i>Homo sapiens</i>              | SLC7A1                        |
| NP_003037 | <i>Homo sapiens</i>              | SLC7A2                        |
| NP_116192 | <i>Homo sapiens</i>              | SLC7A3                        |
| NP_004164 | <i>Homo sapiens</i>              | SLC7A4                        |
| NP_003477 | <i>Homo sapiens</i>              | SLC7A5                        |
| NP_003974 | <i>Homo sapiens</i>              | SLC7A6                        |
| NP_003973 | <i>Homo sapiens</i>              | SLC7A7                        |
| NP_036376 | <i>Homo sapiens</i>              | SLC7A8                        |
| NP_055085 | <i>Homo sapiens</i>              | SLC7A9                        |
| NP_062823 | <i>Homo sapiens</i>              | SLC7A10                       |



|           |                               |                      |
|-----------|-------------------------------|----------------------|
| NP_055146 | Homo sapiens                  | SLC7A11              |
| AAH78940  | Rattus Norvegicus             | SLC7A12              |
| NP_620172 | Homo sapiens                  | SLC7A13              |
| NP_066000 | Homo sapiens                  | SLC7A14              |
| 221126937 | Hydra magnipapillata          | Hydra1               |
| 221121310 | Hydra magnipapillata          | Hydra2               |
| 221127254 | Hydra magnipapillata          | Hydra4               |
| 221130411 | Hydra magnipapillata          | Hydra7               |
| 221126373 | Hydra magnipapillata          | Hydra8               |
| 221113260 | Hydra magnipapillata          | Hydra9               |
| 221118980 | Hydra magnipapillata          | Hydra10              |
| 226467604 | Schistosoma japonicum]        | Schistosoma1         |
| 226467604 | Schistosoma japonicum         | Schistosoma2         |
| 226466642 | Schistosoma japonicum]        | Schistosoma3         |
| 226466690 | Schistosoma japonicum]        | Schistosoma4         |
| 257206294 | Schistosoma japonicum]        | Schistosoma5         |
| 72089275  | Strongylocentrotus purpuratus | Strongylocentrotus1  |
| 72068901  | Strongylocentrotus purpuratus | Strongylocentrotus2  |
| 72021476  | Strongylocentrotus purpuratus | Strongylocentrotus5  |
| 115751524 | Strongylocentrotus purpuratus | Strongylocentrotus6  |
| 115644567 | Strongylocentrotus purpuratus | Strongylocentrotus7  |
| 115676863 | Strongylocentrotus purpuratus | Strongylocentrotus9  |
| 72021472  | Strongylocentrotus purpuratus | Strongylocentrotus12 |
| 72088970  | Strongylocentrotus purpuratus | Strongylocentrotus14 |
| 72017388  | Strongylocentrotus purpuratus | Strongylocentrotus15 |
| 72158774  | Strongylocentrotus purpuratus | Strongylocentrotus20 |
| 115625800 | Strongylocentrotus purpuratus | Strongylocentrotus23 |
| 72092279  | Strongylocentrotus purpuratus | Strongylocentrotus30 |
| AT2G01170 | Arabidopsis thaliana          | BAT1                 |
| AT4G21120 | Arabidopsis thaliana          | CAT1                 |
| AT1G58030 | Arabidopsis thaliana          | CAT2                 |
| AT5G36940 | Arabidopsis thaliana          | CAT3                 |
| AT3G03720 | Arabidopsis thaliana          | CAT4                 |
| AT2G34960 | Arabidopsis thaliana          | CAT5                 |
| AT5G04770 | Arabidopsis thaliana          | CAT6                 |
| AT3G10600 | Arabidopsis thaliana          | CAT7                 |
| AT1G17120 | Arabidopsis thaliana          | CAT8                 |
| AT1G05940 | Arabidopsis thaliana          | CAT9                 |
| AT5G05630 | Arabidopsis thaliana          | LAT1                 |
| AT1G31830 | Arabidopsis thaliana          | LAT3                 |
| AT3G19553 | Arabidopsis thaliana          | LAT4                 |
| AT3G13620 | Arabidopsis thaliana          | LAT5                 |
| AT1G31820 | Arabidopsis thaliana          | LAT2                 |

|           |                                                   |                          |
|-----------|---------------------------------------------------|--------------------------|
| 159462908 | <i>Chlamydomonas reinhardtii</i>                  | <i>Chlamydomonas</i> 1   |
| 159464449 | <i>Chlamydomonas reinhardtii</i>                  | <i>Chlamydomonas</i> 2   |
| 159468099 | <i>Chlamydomonas reinhardtii</i>                  | <i>Chlamydomonas</i> 4   |
| 255089523 | <i>Micromonas</i> sp. RCC299                      | <i>Micromonas</i> 1      |
| 115447681 | <i>Oryza sativa</i> (japonica cultivar-group)     | <i>Oryza</i> 1           |
| 115442193 | <i>Oryza sativa</i> (japonica cultivar-group)     | <i>Oryza</i> 2           |
| 38345948  | <i>Oryza sativa</i> (japonica cultivar-group)     | <i>Oryza</i> 3           |
| 115435214 | <i>Oryza sativa</i> (japonica cultivar-group)     | <i>Oryza</i> 4           |
| 115448121 | <i>Oryza sativa</i> (japonica cultivar-group)     | <i>Oryza</i> 5           |
| 77556594  | <i>Oryza sativa</i> (japonica cultivar-group)     | <i>Oryza</i> 6           |
| 115438394 | <i>Oryza sativa</i> (japonica cultivar-group)     | <i>Oryza</i> 7           |
| 115458492 | <i>Oryza sativa</i> (japonica cultivar-group)     | <i>Oryza</i> 8           |
| 115454391 | <i>Oryza sativa</i> (japonica cultivar-group)     | <i>Oryza</i> 9           |
| 77553705  | <i>Oryza sativa</i> (japonica cultivar-group)     | <i>Oryza</i> 10          |
| 115482164 | <i>Oryza sativa</i> (japonica cultivar-group)     | <i>Oryza</i> 11          |
| 115468406 | <i>Oryza sativa</i> (japonica cultivar-group)     | <i>Oryza</i> 12          |
| 115454291 | <i>Oryza sativa</i> (japonica cultivar-group)     | <i>Oryza</i> 13          |
| 115484255 | <i>Oryza sativa</i> (japonica cultivar-group)     | <i>Oryza</i> 14          |
| 108709462 | <i>Oryza sativa</i> (japonica cultivar-group)     | <i>Oryza</i> 15          |
| 115489644 | <i>Oryza sativa</i> (japonica cultivar-group)     | <i>Oryza</i> 16          |
| 168062753 | <i>Physcomitrella patens</i> subsp. <i>patens</i> | <i>Physcomitrella</i> 1  |
| 168005081 | <i>Physcomitrella patens</i> subsp. <i>patens</i> | <i>Physcomitrella</i> 2  |
| 168026085 | <i>Physcomitrella patens</i> subsp. <i>patens</i> | <i>Physcomitrella</i> 4  |
| 168017509 | <i>Physcomitrella patens</i> subsp. <i>patens</i> | <i>Physcomitrella</i> 5  |
| 168052102 | <i>Physcomitrella patens</i> subsp. <i>patens</i> | <i>Physcomitrella</i> 6  |
| 168051104 | <i>Physcomitrella patens</i> subsp. <i>patens</i> | <i>Physcomitrella</i> 7  |
| 168059656 | <i>Physcomitrella patens</i> subsp. <i>patens</i> | <i>Physcomitrella</i> 8  |
| 168017975 | <i>Physcomitrella patens</i> subsp. <i>patens</i> | <i>Physcomitrella</i> 9  |
| 168053703 | <i>Physcomitrella patens</i> subsp. <i>patens</i> | <i>Physcomitrella</i> 10 |
| 66827465  | <i>Dictyostelium discoideum</i> AX4               | <i>Dictyostelium</i> 1   |
| 66806991  | <i>Dictyostelium discoideum</i> AX4               | <i>Dictyostelium</i> 2   |
| 167378118 | <i>Entamoeba dispar</i> SAW760                    | <i>Entamoeba</i> 1       |
| 167377308 | <i>Entamoeba dispar</i> SAW760                    | <i>Entamoeba</i> 2       |
| 159112306 | <i>Giardia lamblia</i> ATCC 50803                 | <i>Giardia</i> 1         |
| 154334145 | <i>Leishmania braziliensis</i> MHOM/BR/75/M2904   | <i>Leishmania</i> 2      |
| 146081287 | <i>Leishmania infantum</i> JPCM5                  | <i>Leishmania</i> 3      |
| 154333414 | <i>Leishmania braziliensis</i> MHOM/BR/75/M2904   | <i>Leishmania</i> 4      |
| 239890321 | <i>Perkinsus marinus</i> ATCC 50983               | <i>Perkinsus</i> 1       |
| 262100338 | <i>Phytophthora infestans</i> T30-4               | <i>Phytophthora</i> 1    |
| 262100284 | <i>Phytophthora infestans</i> T30-4               | <i>Phytophthora</i> 2    |
| 262100336 | <i>Phytophthora infestans</i> T30-4               | <i>Phytophthora</i> 3    |
| 262104197 | <i>Phytophthora infestans</i> T30-4               | <i>Phytophthora</i> 4    |
| 262099233 | <i>Phytophthora infestans</i> T30-4               | <i>Phytophthora</i> 5    |

|           |                                     |                  |
|-----------|-------------------------------------|------------------|
| 262109011 | Phytophthora infestans T30-4        | Phytophthora6    |
| 262108560 | Phytophthora infestans T30-4        | Phytophthora7    |
| 262100895 | Phytophthora infestans T30-4        | Phytophthora8    |
| 281212435 | Polysphondylium pallidum PN500      | Polysphondylium1 |
| 281206076 | Polysphondylium pallidum PN500      | Polysphondylium2 |
| 224013042 | Thalassiosira pseudonana CCMP1335   | Thalassiosira1   |
| 224013810 | Thalassiosira pseudonana CCMP1335   | Thalassiosira2   |
| 123471297 | Trichomonas vaginalis G3            | Trichomonas1     |
| 123427092 | Trichomonas vaginalis G3            | Trichomonas2     |
| 72390577  | Trypanosoma brucei TREU927          | Trypanosoma1     |
| 71651736  | Trypanosoma cruzi strain CL Brener  | Trypanosoma2     |
| 261331530 | Trypanosoma brucei gambiense DAL972 | Trypanosoma3     |

---

**Supplementary Table 2.** Sequences from the AAP family used for phylogeny construction. Sequences from Genbank (<http://www.ncbi.nlm.nih.gov/genbank/>) were retrieved by psi-BLASTp (Altschul et al, 1997) searches using known members of the family as query.

| GI / Identifier | Name                                                        |                  |
|-----------------|-------------------------------------------------------------|------------------|
| 121720142       | <i>Aspergillus clavatus</i> NRRL 1                          | Aspergillus1     |
| 121715161       | <i>Aspergillus clavatus</i> NRRL 1                          | Aspergillus2     |
| 121717156       | <i>Aspergillus clavatus</i> NRRL 1                          | Aspergillus3     |
| 121719831       | <i>Aspergillus clavatus</i> NRRL 1                          | Aspergillus4     |
| 121714901       | <i>Aspergillus clavatus</i> NRRL 1                          | Aspergillus5     |
| 121704333       | <i>Aspergillus clavatus</i> NRRL 1                          | Aspergillus6     |
| 121706904       | <i>Aspergillus clavatus</i> NRRL 1                          | Aspergillus7     |
| 121701841       | <i>Aspergillus clavatus</i> NRRL 1                          | Aspergillus8     |
| 121711152       | <i>Aspergillus clavatus</i> NRRL 1                          | Aspergillus9     |
| 121706666       | <i>Aspergillus clavatus</i> NRRL 1                          | Aspergillus10    |
| 58266144        | <i>Cryptococcus neoformans</i> var. <i>neoformans</i> JEC21 | Cryptococcus1    |
| 58266738        | <i>Cryptococcus neoformans</i> var. <i>neoformans</i> JEC21 | Cryptococcus2    |
| 58268568        | <i>Cryptococcus neoformans</i> var. <i>neoformans</i> JEC21 | Cryptococcus3    |
| 58268842        | <i>Cryptococcus neoformans</i> var. <i>neoformans</i> JEC21 | Cryptococcus4    |
| 58261924        | <i>Cryptococcus neoformans</i> var. <i>neoformans</i> JEC21 | Cryptococcus5    |
| 58260614        | <i>Cryptococcus neoformans</i> var. <i>neoformans</i> JEC21 | Cryptococcus6    |
| 58263110        | <i>Cryptococcus neoformans</i> var. <i>neoformans</i> JEC21 | Cryptococcus7    |
| 58264068        | <i>Cryptococcus neoformans</i> var. <i>neoformans</i> JEC21 | Cryptococcus8    |
| 85014349        | <i>Encephalitozoon cuniculi</i> GB-M1                       | Encephalitozoon1 |
| 19173597        | <i>Encephalitozoon cuniculi</i> GB-M1                       | Encephalitozoon2 |
| 19074197        | <i>Encephalitozoon cuniculi</i> GB-M1                       | Encephalitozoon3 |
| 19074974        | <i>Encephalitozoon cuniculi</i> GB-M1                       | Encephalitozoon4 |
| 170086712       | <i>Laccaria bicolor</i> S238N-H82                           | Laccaria1        |
| 170093005       | <i>Laccaria bicolor</i> S238N-H82                           | Laccaria2        |
| 85107357        | <i>Neurospora crassa</i> OR74A                              | Neurospora1      |
| 85109776        | <i>Neurospora crassa</i> OR74A                              | Neurospora2      |
| 85101305        | <i>Neurospora crassa</i> OR74A                              | Neurospora3      |
| 164425475       | <i>Neurospora crassa</i> OR74A                              | Neurospora4      |
| 164423426       | <i>Neurospora crassa</i> OR74A                              | Neurospora5      |
| 164423264       | <i>Neurospora crassa</i> OR74A                              | Neurospora6      |
| 164422597       | <i>Neurospora crassa</i> OR74A                              | Neurospora7      |
| 6322702         | <i>Saccharomyces cerevisiae</i>                             | AVT3             |
| 6322460         | <i>Saccharomyces cerevisiae</i>                             | AVT1             |
| 71064098        | <i>Saccharomyces cerevisiae</i>                             | AVT4             |
| 6320771         | <i>Saccharomyces cerevisiae</i>                             | AVT2             |
| 6320965         | <i>Saccharomyces cerevisiae</i>                             | AVT6             |
| 37362614        | <i>Saccharomyces cerevisiae</i>                             | AVT5             |
| 6322103         | <i>Saccharomyces cerevisiae</i>                             | AVT7             |

|           |                                 |                      |
|-----------|---------------------------------|----------------------|
| 19114463  | Schizosaccharomyces pombe 972h- | Schizosaccharomyces1 |
| 19112003  | Schizosaccharomyces pombe 972h- | Schizosaccharomyces2 |
| 115532594 | Caenorhabditis elegans          | Caenorhabditis1      |
| 17555406  | Caenorhabditis elegans          | Caenorhabditis2      |
| 25152682  | Caenorhabditis elegans          | Caenorhabditis3      |
| 32566722  | Caenorhabditis elegans          | Caenorhabditis4      |
| 71984028  | Caenorhabditis elegans          | Caenorhabditis5      |
| 32564098  | Caenorhabditis elegans          | Caenorhabditis6      |
| 71997719  | Caenorhabditis elegans          | Caenorhabditis7      |
| 17507965  | Caenorhabditis elegans          | Caenorhabditis8      |
| 17509747  | Caenorhabditis elegans          | Caenorhabditis9      |
| 17554460  | Caenorhabditis elegans          | Caenorhabditis10     |
| 17553766  | Caenorhabditis elegans          | Caenorhabditis11     |
| 86561574  | Caenorhabditis elegans          | Caenorhabditis13     |
| 21355283  | Drosophila melanogaster         | Drosophila1          |
| 24653572  | Drosophila melanogaster         | Drosophila2          |
| 19922120  | Drosophila melanogaster         | Drosophila3          |
| 24642713  | Drosophila melanogaster         | Drosophila4          |
| 24582818  | Drosophila melanogaster         | Drosophila5          |
| 20151467  | Drosophila melanogaster         | Drosophila6          |
| 261278425 | Drosophila melanogaster         | Drosophila7          |
| 24655811  | Drosophila melanogaster         | Drosophila8          |
| 24642715  | Drosophila melanogaster         | Drosophila9          |
| 281366018 | Drosophila melanogaster         | Drosophila10         |
| 24662401  | Drosophila melanogaster         | Drosophila11         |
| 24652585  | Drosophila melanogaster         | Drosophila12         |
| 28573957  | Drosophila melanogaster         | Drosophila13         |
| 20270233  | Drosophila melanogaster         | Drosophila14         |
| 283982429 | Homo sapiens                    | SLC32A1              |
| 222418631 | Homo sapiens                    | SLC36A1              |
| 40807351  | Homo sapiens                    | SLC36A2              |
| 34535125  | Homo sapiens                    | SLC36A3              |
| 17999520  | Homo sapiens                    | SLC36A4              |
| 62897423  | Homo sapiens                    | SLC38A1              |
| 18482385  | Homo sapiens                    | SLC38A2              |
| 119585453 | Homo sapiens                    | SLC38A3              |
| 289577102 | Homo sapiens                    | SLC38A4              |
| 122937281 | Homo sapiens                    | SLC38A5              |
| 193788624 | Homo sapiens                    | SLC38A6              |
| 21361602  | Homo sapiens                    | SLC38A7              |
| 27735137  | Homo sapiens                    | SLC38A8              |
| 117168275 | Homo sapiens                    | SLC38A9              |
| 20070376  | Homo sapiens                    | SLC38A10             |

|           |                                    |                     |
|-----------|------------------------------------|---------------------|
| 27735137  | Homo sapiens                       | SLC38A11            |
| 221130196 | Hydra magnipapillata               | Hydra1              |
| 221114518 | Hydra magnipapillata               | Hydra3              |
| 221130102 | Hydra magnipapillata               | Hydra6              |
| 221108110 | Hydra magnipapillata               | Hydra7              |
| 221127702 | Hydra magnipapillata               | Hydra9              |
| 221108460 | Hydra magnipapillata               | Hydra11             |
| 221129681 | Hydra magnipapillata               | Hydra12             |
| 221125397 | Hydra magnipapillata               | Hydra13             |
| 221118392 | Hydra magnipapillata               | Hydra15             |
| 221125938 | Hydra magnipapillata               | Hydra17             |
| 115668587 | Strongylocentrotus purpuratus      | Strongylocentrotus1 |
| 115891432 | Strongylocentrotus purpuratus      | Strongylocentrotus3 |
| 115682558 | Strongylocentrotus purpuratus      | Strongylocentrotus5 |
| 115901647 | Strongylocentrotus purpuratus      | Strongylocentrotus7 |
| 115638677 | Strongylocentrotus purpuratus      | Strongylocentrotus8 |
| 115655641 | Strongylocentrotus purpuratus      | Strongylocentrotus9 |
| 253741480 | giardia intestinalis ATCC 50581    | giardia1            |
| 253747195 | giardia intestinalis ATCC 50581    | giardia3            |
| 253743366 | giardia intestinalis ATCC 50581    | giardia4            |
| 253744548 | giardia intestinalis ATCC 50581    | giardia5            |
| 253742150 | giardia intestinalis ATCC 50581    | giardia6            |
| 253741387 | giardia intestinalis ATCC 50581    | giardia7            |
| 253742363 | giardia intestinalis ATCC 50581    | giardia8            |
| 253743450 | giardia intestinalis ATCC 50581    | giardia9            |
| 145500714 | Paramecium tetraurelia strain d4-2 | Paramecium1         |
| 145503710 | Paramecium tetraurelia strain d4-2 | Paramecium3         |
| 145553401 | Paramecium tetraurelia strain d4-2 | Paramecium4         |
| 145538145 | Paramecium tetraurelia strain d4-2 | Paramecium6         |
| 145542732 | Paramecium tetraurelia strain d4-2 | Paramecium7         |
| 145528981 | Paramecium tetraurelia strain d4-2 | Paramecium8         |
| 145516999 | Paramecium tetraurelia strain d4-2 | Paramecium10        |
| 145517320 | Paramecium tetraurelia strain d4-2 | Paramecium12        |
| 145552938 | Paramecium tetraurelia strain d4-2 | Paramecium13        |
| 145481963 | Paramecium tetraurelia strain d4-2 | Paramecium16        |
| 223994085 | Thalassiosira pseudonana CCMP1335  | Thalassiosira2      |
| 223992851 | Thalassiosira pseudonana CCMP1335  | Thalassiosira4      |
| 224007597 | Thalassiosira pseudonana CCMP1335  | Thalassiosira5      |
| 223998941 | Thalassiosira pseudonana CCMP1335  | Thalassiosira10     |
| 224013251 | Thalassiosira pseudonana CCMP1335  | Thalassiosira12     |
| 224001708 | Thalassiosira pseudonana CCMP1335  | Thalassiosira13     |
| 223993835 | Thalassiosira pseudonana CCMP1335  | Thalassiosira17     |
| 123439593 | Trichomonas vaginalis G3           | Trichomonas1        |

|           |                                     |               |
|-----------|-------------------------------------|---------------|
| 123446806 | Trichomonas vaginalis G3            | Trichomonas2  |
| 123507087 | Trichomonas vaginalis G3            | Trichomonas4  |
| 123468288 | Trichomonas vaginalis G3            | Trichomonas5  |
| 123424464 | Trichomonas vaginalis G3            | Trichomonas6  |
| 123486036 | Trichomonas vaginalis G3            | Trichomonas7  |
| 154422478 | Trichomonas vaginalis G3            | Trichomonas8  |
| 123500051 | Trichomonas vaginalis G3            | Trichomonas9  |
| 123498976 | Trichomonas vaginalis G3            | Trichomonas10 |
| 123405089 | Trichomonas vaginalis G3            | Trichomonas11 |
| 154413671 | Trichomonas vaginalis G3            | Trichomonas13 |
| 154416632 | Trichomonas vaginalis G3            | Trichomonas15 |
| 123472736 | Trichomonas vaginalis G3            | Trichomonas18 |
| 123468430 | Trichomonas vaginalis G3            | Trichomonas20 |
| 123421044 | Trichomonas vaginalis G3            | Trichomonas24 |
| 123440014 | Trichomonas vaginalis G3            | Trichomonas25 |
| 123464250 | Trichomonas vaginalis G3            | Trichomonas26 |
| 123481467 | Trichomonas vaginalis G3            | Trichomonas28 |
| 123416448 | Trichomonas vaginalis G3            | Trichomonas31 |
| 154413253 | Trichomonas vaginalis G3            | Trichomonas32 |
| 154415927 | Trichomonas vaginalis G3            | Trichomonas36 |
| 123412832 | Trichomonas vaginalis G3            | Trichomonas37 |
| 261330865 | Trypanosoma brucei gambiense DAL972 | Trypanosoma1  |
| 261335674 | Trypanosoma brucei gambiense DAL972 | Trypanosoma2  |
| 261335665 | Trypanosoma brucei gambiense DAL972 | Trypanosoma3  |
| 261330931 | Trypanosoma brucei gambiense DAL972 | Trypanosoma5  |
| 261327815 | Trypanosoma brucei gambiense DAL972 | Trypanosoma6  |
| 261330861 | Trypanosoma brucei gambiense DAL972 | Trypanosoma8  |
| 261330525 | Trypanosoma brucei gambiense DAL972 | Trypanosoma25 |
| 261327728 | Trypanosoma brucei gambiense DAL972 | Trypanosoma26 |
| 261332711 | Trypanosoma brucei gambiense DAL972 | Trypanosoma29 |
| 261333112 | Trypanosoma brucei gambiense DAL972 | Trypanosoma30 |
| 261332621 | Trypanosoma brucei gambiense DAL972 | Trypanosoma31 |
| AT1G58360 | Arabidopsis thaliana                | AAP1          |
| AT5G09220 | Arabidopsis thaliana                | AAP2          |
| AT1G77380 | Arabidopsis thaliana                | AAP3          |
| AT5G63850 | Arabidopsis thaliana                | AAP4          |
| AT1G44100 | Arabidopsis thaliana                | AAP5          |
| AT5G49630 | Arabidopsis thaliana                | AAP6          |
| AT5G23810 | Arabidopsis thaliana                | AAP7          |
| AT1G10010 | Arabidopsis thaliana                | AAP8          |
| AT3G11900 | Arabidopsis thaliana                | ANT1          |
| AT4G38250 | Arabidopsis thaliana                | ANT2          |
| AT5G65990 | Arabidopsis thaliana                | ANT3          |

|           |                                    |                        |
|-----------|------------------------------------|------------------------|
| AT2G42005 | <i>Arabidopsis thaliana</i>        | ANT4                   |
| AT1G48640 | <i>Arabidopsis thaliana</i>        | LHT10                  |
| AT5G40780 | <i>Arabidopsis thaliana</i>        | LHT1                   |
| AT1G24400 | <i>Arabidopsis thaliana</i>        | LHT2                   |
| AT1G61270 | <i>Arabidopsis thaliana</i>        | LHT3                   |
| AT1G47670 | <i>Arabidopsis thaliana</i>        | LHT4                   |
| AT1G67640 | <i>Arabidopsis thaliana</i>        | LHT5                   |
| AT3G01760 | <i>Arabidopsis thaliana</i>        | LHT6                   |
| AT4G35180 | <i>Arabidopsis thaliana</i>        | LHT7                   |
| AT1G71680 | <i>Arabidopsis thaliana</i>        | LHT8                   |
| AT1G25530 | <i>Arabidopsis thaliana</i>        | LHT9                   |
| AT2G39890 | <i>Arabidopsis thaliana</i>        | ProT1                  |
| AT3G55740 | <i>Arabidopsis thaliana</i>        | ProT2                  |
| AT2G36590 | <i>Arabidopsis thaliana</i>        | ProT3                  |
| AT5G41800 | <i>Arabidopsis thaliana</i>        | ProT4                  |
| AT2G40420 | <i>Arabidopsis thaliana</i>        | T1                     |
| AT3G56200 | <i>Arabidopsis thaliana</i>        | T2                     |
| AT3G30390 | <i>Arabidopsis thaliana</i>        | T3                     |
| AT5G38820 | <i>Arabidopsis thaliana</i>        | T4                     |
| AT1G80510 | <i>Arabidopsis thaliana</i>        | T5                     |
| AT3G28960 | <i>Arabidopsis thaliana</i>        | VAAT1                  |
| AT5G16740 | <i>Arabidopsis thaliana</i>        | VAAT10                 |
| AT5G15240 | <i>Arabidopsis thaliana</i>        | VAAT2                  |
| AT2G41190 | <i>Arabidopsis thaliana</i>        | VAAT3                  |
| AT2G39130 | <i>Arabidopsis thaliana</i>        | VAAT4                  |
| AT3G54830 | <i>Arabidopsis thaliana</i>        | VAAT5                  |
| AT3G09330 | <i>Arabidopsis thaliana</i>        | VAAT6                  |
| AT3G09340 | <i>Arabidopsis thaliana</i>        | VAAT7                  |
| AT5G02170 | <i>Arabidopsis thaliana</i>        | VAAT8                  |
| AT5G02180 | <i>Arabidopsis thaliana</i>        | VAAT9                  |
| AT1G08230 | <i>Arabidopsis thaliana</i>        | GAT1                   |
| AT1G77690 | <i>Arabidopsis thaliana</i>        | LAX3                   |
| AT2G21050 | <i>Arabidopsis thaliana</i>        | LAX2                   |
| AT2G38120 | <i>Arabidopsis thaliana</i>        | AUX1                   |
| AT5G01240 | <i>Arabidopsis thaliana</i>        | LAX1                   |
| 159476374 | <i>Chlamydomonas reinhardtii</i>   | <i>Chlamydomonas</i> 1 |
| 159473525 | <i>Chlamydomonas reinhardtii</i>   | <i>Chlamydomonas</i> 2 |
| 159473527 | <i>Chlamydomonas reinhardtii</i>   | <i>Chlamydomonas</i> 3 |
| 159466506 | <i>Chlamydomonas reinhardtii</i>   | <i>Chlamydomonas</i> 4 |
| 159491088 | <i>Chlamydomonas reinhardtii</i>   | <i>Chlamydomonas</i> 5 |
| 159483671 | <i>Chlamydomonas reinhardtii</i>   | <i>Chlamydomonas</i> 6 |
| 159483281 | <i>Chlamydomonas reinhardtii</i>   | <i>Chlamydomonas</i> 7 |
| 226456327 | <i>Micromonas pusilla</i> CCMP1545 | <i>Micromonas</i> 1    |



|           |                                     |                  |
|-----------|-------------------------------------|------------------|
| 226461197 | Micromonas pusilla CCMP1545         | Micromonas2      |
| 226456325 | Micromonas pusilla CCMP1545         | Micromonas3      |
| 226458937 | Micromonas pusilla CCMP1545         | Micromonas4      |
| 226455333 | Micromonas pusilla CCMP1545         | Micromonas5      |
| 226459038 | Micromonas pusilla CCMP1545         | Micromonas6      |
| 226463296 | Micromonas pusilla CCMP1545         | Micromonas7      |
| 168064167 | Physcomitrella patens subsp. patens | Physcomitrella1  |
| 167999963 | Physcomitrella patens subsp. patens | Physcomitrella2  |
| 168026449 | Physcomitrella patens subsp. patens | Physcomitrella3  |
| 168066039 | Physcomitrella patens subsp. patens | Physcomitrella4  |
| 168025550 | Physcomitrella patens subsp. patens | Physcomitrella5  |
| 168035406 | Physcomitrella patens subsp. patens | Physcomitrella6  |
| 168026105 | Physcomitrella patens subsp. patens | Physcomitrella7  |
| 168037028 | Physcomitrella patens subsp. patens | Physcomitrella8  |
| 168003800 | Physcomitrella patens subsp. patens | Physcomitrella9  |
| 168011490 | Physcomitrella patens subsp. patens | Physcomitrella10 |
| 168048761 | Physcomitrella patens subsp. patens | Physcomitrella11 |
| 168058043 | Physcomitrella patens subsp. patens | Physcomitrella12 |
| 167998769 | Physcomitrella patens subsp. patens | Physcomitrella13 |
| 168058666 | Physcomitrella patens subsp. patens | Physcomitrella14 |
| 168018811 | Physcomitrella patens subsp. patens | Physcomitrella15 |
| 168012078 | Physcomitrella patens subsp. patens | Physcomitrella16 |
| 168045679 | Physcomitrella patens subsp. patens | Physcomitrella17 |
| 168061108 | Physcomitrella patens subsp. patens | Physcomitrella18 |
| 168017275 | Physcomitrella patens subsp. patens | Physcomitrella19 |
| 168025272 | Physcomitrella patens subsp. patens | Physcomitrella20 |
| 168031344 | Physcomitrella patens subsp. patens | Physcomitrella21 |
| 168048695 | Physcomitrella patens subsp. patens | Physcomitrella22 |
| 168029276 | Physcomitrella patens subsp. patens | Physcomitrella23 |
| 168049005 | Physcomitrella patens subsp. patens | Physcomitrella24 |
| 168056905 | Physcomitrella patens subsp. patens | Physcomitrella27 |
| 168020354 | Physcomitrella patens subsp. patens | Physcomitrella28 |

---

**References:**

Altschul SF, Madden TL, Schäffer AA, Zhang J, Zhang Z, Miller W, Lipman DJ. 1997. Gapped BLAST and PSI-BLAST: a new generation of protein database search programs. *Nucleic Acids Res.* 25:3389-402.

Huelsenbeck, J. P., F. Ronquist, R. Nielsen and J. P. Bollback. 2001. Bayesian inference of phylogeny and its impact on evolutionary biology. *Science* 294: 2310-2314.

Kumar S, Dudley J, Nei M & Tamura K (2008) MEGA: A biologist-centric software for evolutionary analysis of DNA and protein sequences. *Briefings in Bioinformatics* 9: 299-306.

Ronquist, F. and J. P. Huelsenbeck. 2003. MRBAYES 3: Bayesian phylogenetic inference under mixed models. *Bioinformatics* 19:1572-1574.

Saitou N and Nei M. 1987. The neighbor-joining method: A new method for reconstructing phylogenetic trees. *Molecular Biology and Evolution* 4:406-425.

Zuckerlandl E and Pauling L. 1965. Evolutionary divergence and convergence in proteins, pp. 97-166 in *Evolving Genes and Proteins*, edited by V. Bryson and H.J. Vogel. Academic Press, New York.
